# Supplementary material
Source: HighWire-hosted journal article supplement (http://www.qdcxjkg.com/highwire/filestream/113975/field_highwire_adjunct_files/0/ERJ-01091-2012_Disclosures.pdf)
Supplement: ERJ-01091-2012_Disclosures.pdf [file ERJ-01091-2012_Disclosures.pdf]

**B. Holtfreter** and **S. Richter** were supported by unlimited grants from GABA (Therwil, Switzerland).
